# Supplementary material for: Redox activity and chemical interactions of metal oxide nano- and micro-particles with dithiothreitol (DTT)
Source: Royal Society of Chemistry journal article supplement (doi:10.1039/c5em00352k), 2015-01-01
Supplement: c5em00352k1.pdf [file c5em00352k1.pdf]

## Supplementary Materials

### **Redox Activity and Chemical Interaction of Metal Oxide Nano- and Micro- Particles with Dithiothreitol (DTT)**

Johny Nicolas,<sup>1</sup> Malek Jaafar,<sup>1</sup> Elizabeth Sepetdjian,<sup>1</sup> Walid Saad,<sup>2</sup> Constantinos Sioutas,<sup>3</sup> Alan Shihadeh,<sup>4</sup> and Najat A. Saliba.<sup>1\*</sup>

<sup>1</sup>American University of Beirut, Lebanon, Chemistry Department, Faculty of Arts and Sciences

<sup>2</sup>American University of Beirut, Lebanon, Chemical Engineering Program, Faculty of Engineering and Architecture

<sup>3</sup>University of Southern California, Department of Civil and Environmental Engineering, Los Angeles, USA

<sup>4</sup>American University of Beirut, Lebanon, Mechanical Engineering Department, Faculty of Engineering and Architecture

\*Corresponding Author: Najat Saliba, Ph.D., American University of Beirut, Beirut, Lebanon. E-mail: ns30@aub.edu.lb

## Results and Discussion

**Particle size distribution:** Particle diameters of the tested commercial MOs (CuO, MnO<sub>2</sub>, ZnO, PbO, Pb<sub>3</sub>O<sub>4</sub> and Cr<sub>2</sub>O<sub>3</sub>) were measured using SEM. Samples of SEM images of ZnO and Pb<sub>3</sub>O<sub>4</sub> are shown in Figure S1. Diameters of 100 mineral oxide particles (100 for each of the 6 different metal oxides) are shown in Table S1.

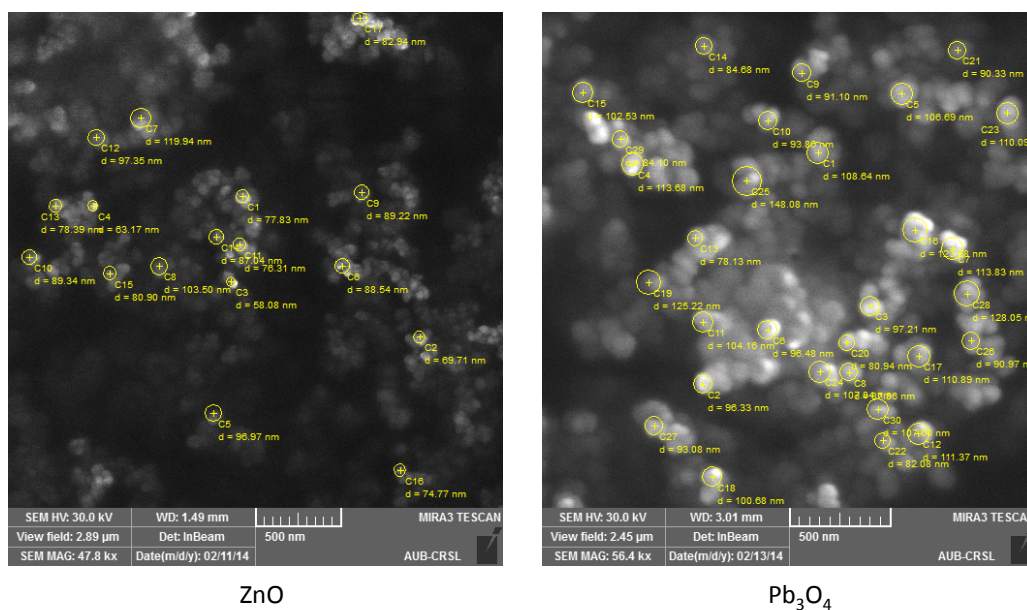

Figure S1 SEM sample images of ZnO and Pb<sub>3</sub>O<sub>4</sub> dispersed particles characterized by averaging the diameters of 100 particles

Table S1 Average diameters (nm) of 100 particles of the six different metal oxides that were tested for their reactivity against Dithiothreitol (DTT)

| Metal Oxide                    | Average Diameter (nm) | Standard Deviation |
|--------------------------------|-----------------------|--------------------|
| CuO                            | 67.8                  | 5.1                |
| MnO <sub>2</sub>               | 96.2                  | 6.7                |
| ZnO                            | 78.4                  | 9.1                |
| PbO                            | 87.3                  | 7.1                |
| Pb <sub>3</sub> O <sub>4</sub> | 76.3                  | 6.4                |
| Cr <sub>2</sub> O <sub>3</sub> | 69.3                  | 6.6                |
| <b>Average</b>                 | <b>79.22</b>          | <b>6.83</b>        |

*DTT redox activity:* SEM images and EDX spectra, taken before (A) and after adding DTT solutions (B) to suspended CuO in methanol. Image (B) shows the presence of sulfur atom at the surface of the CuO after reacting with DTT (Figure S2).

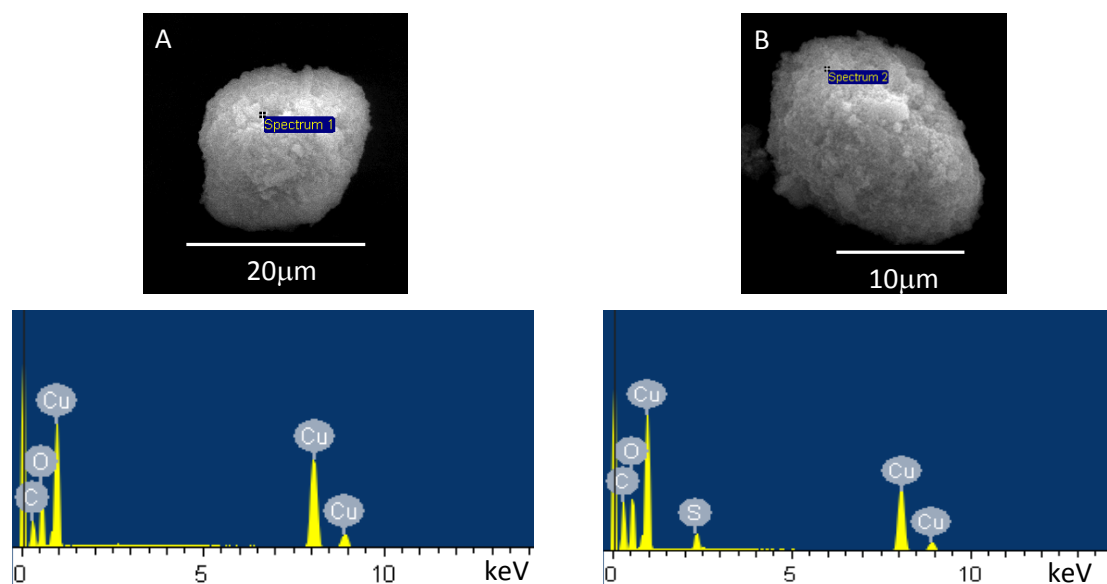

Figure S2 SEM Images and EDX spectra of CuO particle taken before (A) and after the addition of DTT solutions (B) to suspended CuO in methanol

Table S2 EDX analysis of the particle surface at the point indicated in Figure S2

| Element | Before adding DTT |          | After adding DTT |          |
|---------|-------------------|----------|------------------|----------|
|         | Weight %          | Atomic % | Weight %         | Atomic % |
| C K     | 34.91             | 53.59    | 43.56            | 58.68    |
| O K     | 31.91             | 36.78    | 35.15            | 35.55    |
| Cu K    | 33.18             | 9.63     | 19.91            | 5.07     |
| S K     |                   |          | 1.39             | 0.70     |

Table S3. Assignments of the Infra red frequencies for the DTT and oxidized DTT spectra

| Wavenumber (cm <sup>-1</sup> ) | DTT                                                    | Oxidized DTT                                                                                                         |
|--------------------------------|--------------------------------------------------------|----------------------------------------------------------------------------------------------------------------------|
| 677                            | $\nu(\text{C-S})$ stretch                              |                                                                                                                      |
| 746 and 756                    |                                                        | $\nu(\text{C-S})$ stretch of the <i>Gauche</i> and <i>Trans</i> forms around the C-C bonds                           |
| 791                            |                                                        | $\nu(\text{CH}_2)$ rocking attached to disulfide                                                                     |
| 994, 1008, and 1036            |                                                        | $\nu(\text{C-C})$ vibrations with an enhanced and sharp <i>Trans</i> $\nu(\text{C-C})$ band at 1036 cm <sup>-1</sup> |
| 1054 and 1101                  | $\nu(\text{C-O})$ stretch                              |                                                                                                                      |
| 1060                           |                                                        | $\nu(\text{C-O})$ stretch                                                                                            |
| 1100 and 1375                  |                                                        | $\nu(\text{CH}_2)$ twisting-rocking and wagging bands                                                                |
| 1230 and 1320                  | $\nu(\text{CH}_2)$ deformation                         |                                                                                                                      |
| 1408                           | $\nu(\text{CH}_2)$ scissoring                          |                                                                                                                      |
| 1453                           |                                                        | $\nu(\text{CH}_2)$ sharp; scissoring typical of disulfide DTT adsorbed on metal surfaces                             |
| 2547 and 2564                  | $\nu(\text{S-H})$ stretch                              |                                                                                                                      |
| 2873, 2909, 2930 and 2956      |                                                        | $\nu(\text{CH}_2)$ asymmetric and symmetric stretch                                                                  |
| 2910 and 2970                  | $\nu(\text{C-H})$ stretch                              |                                                                                                                      |
| 3303                           |                                                        | $\nu(\text{OH})$ intra-molecularly bond                                                                              |
| 3360                           | $\nu(\text{OH})$ hydrogen bond with methanol (solvent) |                                                                                                                      |
| 3430                           |                                                        | $\nu(\text{OH})$ un-bonded                                                                                           |
